# Supplementary material for: Fauna Europaea: Gastrotricha
Source: Biodivers Data J. 2015 Aug 14;(3):e5800. doi: 10.3897/BDJ.3.e5800 (PMC4563153; doi:10.3897/BDJ.3.e5800)
Supplement: Supplementary material 1 — Fauna Europaea Gastrotricha species version 3 (draft May 2015) [file biodiversity_data_journal-3-e5800-s001.xlsx]

## Sheet: Blad1
Fauna Europaea Gastrotrichia version 3 (draft)
Kindom	Subkingdom	Phylum	Order	Family	Genus	Subgenus	Species	Subspecies	Author(s)	Date	Parentheses (Y/N)	Comment
Animalia Linnaeus, 1758	Eumetazoa Buetschli, 1910	Gastrotricha Metschnikoff, 1865	Chaetonotida Remane, 1925	Chaetonotidae	Aspidiophorus		aster		Martin	1981	N
Animalia Linnaeus, 1758	Eumetazoa Buetschli, 1910	Gastrotricha Metschnikoff, 1865	Chaetonotida Remane, 1925	Chaetonotidae	Aspidiophorus		bibulbosus		Kisielewski	1979	N
Animalia Linnaeus, 1758	Eumetazoa Buetschli, 1910	Gastrotricha Metschnikoff, 1865	Chaetonotida Remane, 1925	Chaetonotidae	Aspidiophorus		heterodermus		Saito	1937	N
Animalia Linnaeus, 1758	Eumetazoa Buetschli, 1910	Gastrotricha Metschnikoff, 1865	Chaetonotida Remane, 1925	Chaetonotidae	Aspidiophorus		longichaetus		Kisielewski	1986	N
Animalia Linnaeus, 1758	Eumetazoa Buetschli, 1910	Gastrotricha Metschnikoff, 1865	Chaetonotida Remane, 1925	Chaetonotidae	Aspidiophorus		microlepidotus		d'Hondt	1978	N
Animalia Linnaeus, 1758	Eumetazoa Buetschli, 1910	Gastrotricha Metschnikoff, 1865	Chaetonotida Remane, 1925	Chaetonotidae	Aspidiophorus		microsquamatus		Saito	1937	N
Animalia Linnaeus, 1758	Eumetazoa Buetschli, 1910	Gastrotricha Metschnikoff, 1865	Chaetonotida Remane, 1925	Chaetonotidae	Aspidiophorus		oculifer		Kisielewski	1981	N
Animalia Linnaeus, 1758	Eumetazoa Buetschli, 1910	Gastrotricha Metschnikoff, 1865	Chaetonotida Remane, 1925	Chaetonotidae	Aspidiophorus		ophiodermus		Balsamo	1983	N
Animalia Linnaeus, 1758	Eumetazoa Buetschli, 1910	Gastrotricha Metschnikoff, 1865	Chaetonotida Remane, 1925	Chaetonotidae	Aspidiophorus		paradoxus		Voigt	1902	Y
Animalia Linnaeus, 1758	Eumetazoa Buetschli, 1910	Gastrotricha Metschnikoff, 1865	Chaetonotida Remane, 1925	Chaetonotidae	Aspidiophorus		polonicus		Kisielewski	1981	N
Animalia Linnaeus, 1758	Eumetazoa Buetschli, 1910	Gastrotricha Metschnikoff, 1865	Chaetonotida Remane, 1925	Chaetonotidae	Aspidiophorus		schlitzensis		Schwank	1990	N
Animalia Linnaeus, 1758	Eumetazoa Buetschli, 1910	Gastrotricha Metschnikoff, 1865	Chaetonotida Remane, 1925	Chaetonotidae	Aspidiophorus		slovinensis		Kisielewski	1986	N
Animalia Linnaeus, 1758	Eumetazoa Buetschli, 1910	Gastrotricha Metschnikoff, 1865	Chaetonotida Remane, 1925	Chaetonotidae	Aspidiophorus		squamulosus		Roszczak	1936	Y
Animalia Linnaeus, 1758	Eumetazoa Buetschli, 1910	Gastrotricha Metschnikoff, 1865	Chaetonotida Remane, 1925	Chaetonotidae	Aspidiophorus		tatraensis		Kisielewski	1986	N
Animalia Linnaeus, 1758	Eumetazoa Buetschli, 1910	Gastrotricha Metschnikoff, 1865	Chaetonotida Remane, 1925	Chaetonotidae	Aspidiophorus		tetrachaetus		Kisielewski	1986	Y
Animalia Linnaeus, 1758	Eumetazoa Buetschli, 1910	Gastrotricha Metschnikoff, 1865	Chaetonotida Remane, 1925	Chaetonotidae	Chaetonotus	Chaetonotus	acanthophorus		Stokes	1887	N
Animalia Linnaeus, 1758	Eumetazoa Buetschli, 1910	Gastrotricha Metschnikoff, 1865	Chaetonotida Remane, 1925	Chaetonotidae	Chaetonotus	Chaetonotus	aemilianus		Balsamo	1978	N
Animalia Linnaeus, 1758	Eumetazoa Buetschli, 1910	Gastrotricha Metschnikoff, 1865	Chaetonotida Remane, 1925	Chaetonotidae	Chaetonotus	Chaetonotus	alatus		Schwank	1990	N
Animalia Linnaeus, 1758	Eumetazoa Buetschli, 1910	Gastrotricha Metschnikoff, 1865	Chaetonotida Remane, 1925	Chaetonotidae	Chaetonotus	Chaetonotus	alni		Nesteruk	1991	N
Animalia Linnaeus, 1758	Eumetazoa Buetschli, 1910	Gastrotricha Metschnikoff, 1865	Chaetonotida Remane, 1925	Chaetonotidae	Chaetonotus	Chaetonotus	balsamoae		Kisielewski	1997	N
Animalia Linnaeus, 1758	Eumetazoa Buetschli, 1910	Gastrotricha Metschnikoff, 1865	Chaetonotida Remane, 1925	Chaetonotidae	Chaetonotus	Chaetonotus	beauchampi		d'Hondt	1967	N
Animalia Linnaeus, 1758	Eumetazoa Buetschli, 1910	Gastrotricha Metschnikoff, 1865	Chaetonotida Remane, 1925	Chaetonotidae	Chaetonotus	Chaetonotus	benacensis		Balsamo & Fregni	1995	N
Animalia Linnaeus, 1758	Eumetazoa Buetschli, 1910	Gastrotricha Metschnikoff, 1865	Chaetonotida Remane, 1925	Chaetonotidae	Chaetonotus	Chaetonotus	bifidispinosus		Tretjakova	1991	N
Animalia Linnaeus, 1758	Eumetazoa Buetschli, 1910	Gastrotricha Metschnikoff, 1865	Chaetonotida Remane, 1925	Chaetonotidae	Chaetonotus	Chaetonotus	brevispinosus		Zelinka	1889	N
Animalia Linnaeus, 1758	Eumetazoa Buetschli, 1910	Gastrotricha Metschnikoff, 1865	Chaetonotida Remane, 1925	Chaetonotidae	Chaetonotus	Chaetonotus	christianus		Schwank	1990	N
Animalia Linnaeus, 1758	Eumetazoa Buetschli, 1910	Gastrotricha Metschnikoff, 1865	Chaetonotida Remane, 1925	Chaetonotidae	Chaetonotus	Chaetonotus	crassus		Preobrajenskaia	1926	N
Animalia Linnaeus, 1758	Eumetazoa Buetschli, 1910	Gastrotricha Metschnikoff, 1865	Chaetonotida Remane, 1925	Chaetonotidae	Chaetonotus	Chaetonotus	daphnes		Balsamo & Todaro	1995	N
Animalia Linnaeus, 1758	Eumetazoa Buetschli, 1910	Gastrotricha Metschnikoff, 1865	Chaetonotida Remane, 1925	Chaetonotidae	Chaetonotus	Chaetonotus	decemsetosus		Marcolongo	1910	N
Animalia Linnaeus, 1758	Eumetazoa Buetschli, 1910	Gastrotricha Metschnikoff, 1865	Chaetonotida Remane, 1925	Chaetonotidae	Chaetonotus	Chaetonotus	disjunctus		Greuter	1917	N
Animalia Linnaeus, 1758	Eumetazoa Buetschli, 1910	Gastrotricha Metschnikoff, 1865	Chaetonotida Remane, 1925	Chaetonotidae	Chaetonotus	Chaetonotus	dybowskii		Jakubski	1919	N
Animalia Linnaeus, 1758	Eumetazoa Buetschli, 1910	Gastrotricha Metschnikoff, 1865	Chaetonotida Remane, 1925	Chaetonotidae	Chaetonotus	Chaetonotus	elegans		Konsuloff	1921	N
Animalia Linnaeus, 1758	Eumetazoa Buetschli, 1910	Gastrotricha Metschnikoff, 1865	Chaetonotida Remane, 1925	Chaetonotidae	Chaetonotus	Chaetonotus	enormis		Stokes	1887	N
Animalia Linnaeus, 1758	Eumetazoa Buetschli, 1910	Gastrotricha Metschnikoff, 1865	Chaetonotida Remane, 1925	Chaetonotidae	Chaetonotus	Chaetonotus	euhystrix		Schwank	1990	N
Animalia Linnaeus, 1758	Eumetazoa Buetschli, 1910	Gastrotricha Metschnikoff, 1865	Chaetonotida Remane, 1925	Chaetonotidae	Chaetonotus	Chaetonotus	eximius		Kolicka, Kisielewski,Nesteruk & Zawierucha	2013	N	New addition
Animalia Linnaeus, 1758	Eumetazoa Buetschli, 1910	Gastrotricha Metschnikoff, 1865	Chaetonotida Remane, 1925	Chaetonotidae	Chaetonotus	Chaetonotus	ferrarius		Schwank	1990	N
Animalia Linnaeus, 1758	Eumetazoa Buetschli, 1910	Gastrotricha Metschnikoff, 1865	Chaetonotida Remane, 1925	Chaetonotidae	Chaetonotus	Chaetonotus	fluviatilis		Balsamo & Kisielewski	1986	N
Animalia Linnaeus, 1758	Eumetazoa Buetschli, 1910	Gastrotricha Metschnikoff, 1865	Chaetonotida Remane, 1925	Chaetonotidae	Chaetonotus	Chaetonotus	greuteri		Remane	1927	N
Animalia Linnaeus, 1758	Eumetazoa Buetschli, 1910	Gastrotricha Metschnikoff, 1865	Chaetonotida Remane, 1925	Chaetonotidae	Chaetonotus	Chaetonotus	heterochaetus		Daday	1905	N
Animalia Linnaeus, 1758	Eumetazoa Buetschli, 1910	Gastrotricha Metschnikoff, 1865	Chaetonotida Remane, 1925	Chaetonotidae	Chaetonotus	Chaetonotus	heterospinosus		Balsamo	1978	N
Animalia Linnaeus, 1758	Eumetazoa Buetschli, 1910	Gastrotricha Metschnikoff, 1865	Chaetonotida Remane, 1925	Chaetonotidae	Chaetonotus	Chaetonotus	hirsutus		Marcolongo	1910	N
Animalia Linnaeus, 1758	Eumetazoa Buetschli, 1910	Gastrotricha Metschnikoff, 1865	Chaetonotida Remane, 1925	Chaetonotidae	Chaetonotus	Chaetonotus	hoanicus		Schwank	1990	N
Animalia Linnaeus, 1758	Eumetazoa Buetschli, 1910	Gastrotricha Metschnikoff, 1865	Chaetonotida Remane, 1925	Chaetonotidae	Chaetonotus	Chaetonotus	hystrix		Metschnikoff	1865	N
Animalia Linnaeus, 1758	Eumetazoa Buetschli, 1910	Gastrotricha Metschnikoff, 1865	Chaetonotida Remane, 1925	Chaetonotidae	Chaetonotus	Chaetonotus	ichthydioides		Tongiorgi, Fregni & Balsamo	1999	N
Animalia Linnaeus, 1758	Eumetazoa Buetschli, 1910	Gastrotricha Metschnikoff, 1865	Chaetonotida Remane, 1925	Chaetonotidae	Chaetonotus	Chaetonotus	illiesi		Schwank	1990	N
Animalia Linnaeus, 1758	Eumetazoa Buetschli, 1910	Gastrotricha Metschnikoff, 1865	Chaetonotida Remane, 1925	Chaetonotidae	Chaetonotus	Chaetonotus	italicus		Balsamo & Todaro	1995	N
Animalia Linnaeus, 1758	Eumetazoa Buetschli, 1910	Gastrotricha Metschnikoff, 1865	Chaetonotida Remane, 1925	Chaetonotidae	Chaetonotus	Chaetonotus	laroides		Marcolongo	1910	N
Animalia Linnaeus, 1758	Eumetazoa Buetschli, 1910	Gastrotricha Metschnikoff, 1865	Chaetonotida Remane, 1925	Chaetonotidae	Chaetonotus	Chaetonotus	larus		Müller	1773	Y
Animalia Linnaeus, 1758	Eumetazoa Buetschli, 1910	Gastrotricha Metschnikoff, 1865	Chaetonotida Remane, 1925	Chaetonotidae	Chaetonotus	Chaetonotus	linguaeformis		Voigt	1902	N
Animalia Linnaeus, 1758	Eumetazoa Buetschli, 1910	Gastrotricha Metschnikoff, 1865	Chaetonotida Remane, 1925	Chaetonotidae	Chaetonotus	Chaetonotus	longisetosus		Preobrajenskaia	1926	N
Animalia Linnaeus, 1758	Eumetazoa Buetschli, 1910	Gastrotricha Metschnikoff, 1865	Chaetonotida Remane, 1925	Chaetonotidae	Chaetonotus	Chaetonotus	longispinosus		Stokes	1887	N
Animalia Linnaeus, 1758	Eumetazoa Buetschli, 1910	Gastrotricha Metschnikoff, 1865	Chaetonotida Remane, 1925	Chaetonotidae	Chaetonotus	Chaetonotus	lucksi		Voigt	1958	N
Animalia Linnaeus, 1758	Eumetazoa Buetschli, 1910	Gastrotricha Metschnikoff, 1865	Chaetonotida Remane, 1925	Chaetonotidae	Chaetonotus	Chaetonotus	lunatospinosus		Balsamo	1981	N
Animalia Linnaeus, 1758	Eumetazoa Buetschli, 1910	Gastrotricha Metschnikoff, 1865	Chaetonotida Remane, 1925	Chaetonotidae	Chaetonotus	Chaetonotus	macrochaetus		Zelinka	1889	N
Animalia Linnaeus, 1758	Eumetazoa Buetschli, 1910	Gastrotricha Metschnikoff, 1865	Chaetonotida Remane, 1925	Chaetonotidae	Chaetonotus	Chaetonotus	maximus		Ehrenberg	1838	N
Animalia Linnaeus, 1758	Eumetazoa Buetschli, 1910	Gastrotricha Metschnikoff, 1865	Chaetonotida Remane, 1925	Chaetonotidae	Chaetonotus	Chaetonotus	microchaetus		Preobrajenskaia	1926	N
Animalia Linnaeus, 1758	Eumetazoa Buetschli, 1910	Gastrotricha Metschnikoff, 1865	Chaetonotida Remane, 1925	Chaetonotidae	Chaetonotus	Chaetonotus	minimus		Marcolongo	1910	N
Animalia Linnaeus, 1758	Eumetazoa Buetschli, 1910	Gastrotricha Metschnikoff, 1865	Chaetonotida Remane, 1925	Chaetonotidae	Chaetonotus	Chaetonotus	mitraformis		Greuter	1917	N
Animalia Linnaeus, 1758	Eumetazoa Buetschli, 1910	Gastrotricha Metschnikoff, 1865	Chaetonotida Remane, 1925	Chaetonotidae	Chaetonotus	Chaetonotus	multispinosus		Grünspan	1908	N
Animalia Linnaeus, 1758	Eumetazoa Buetschli, 1910	Gastrotricha Metschnikoff, 1865	Chaetonotida Remane, 1925	Chaetonotidae	Chaetonotus	Chaetonotus	murrayi		Remane	1929	N
Animalia Linnaeus, 1758	Eumetazoa Buetschli, 1910	Gastrotricha Metschnikoff, 1865	Chaetonotida Remane, 1925	Chaetonotidae	Chaetonotus	Chaetonotus	naiadis		Balsamo & Todaro	1995	N
Animalia Linnaeus, 1758	Eumetazoa Buetschli, 1910	Gastrotricha Metschnikoff, 1865	Chaetonotida Remane, 1925	Chaetonotidae	Chaetonotus	Chaetonotus	novenarius		Greuter	1917	N
Animalia Linnaeus, 1758	Eumetazoa Buetschli, 1910	Gastrotricha Metschnikoff, 1865	Chaetonotida Remane, 1925	Chaetonotidae	Chaetonotus	Chaetonotus	octonarius		Stokes	1887	N
Animalia Linnaeus, 1758	Eumetazoa Buetschli, 1910	Gastrotricha Metschnikoff, 1865	Chaetonotida Remane, 1925	Chaetonotidae	Chaetonotus	Chaetonotus	oculatus		Schwank	1990	N
Animalia Linnaeus, 1758	Eumetazoa Buetschli, 1910	Gastrotricha Metschnikoff, 1865	Chaetonotida Remane, 1925	Chaetonotidae	Chaetonotus	Chaetonotus	oculifer		Kisielewski	1981	N
Animalia Linnaeus, 1758	Eumetazoa Buetschli, 1910	Gastrotricha Metschnikoff, 1865	Chaetonotida Remane, 1925	Chaetonotidae	Chaetonotus	Chaetonotus	oplites		Balsamo, Fregni & Tongiorgi	1994	N
Animalia Linnaeus, 1758	Eumetazoa Buetschli, 1910	Gastrotricha Metschnikoff, 1865	Chaetonotida Remane, 1925	Chaetonotidae	Chaetonotus	Chaetonotus	paluster		d'Hondt	1967	N
Animalia Linnaeus, 1758	Eumetazoa Buetschli, 1910	Gastrotricha Metschnikoff, 1865	Chaetonotida Remane, 1925	Chaetonotidae	Chaetonotus	Chaetonotus	parafurcatus		Nesteruk	1991	N
Animalia Linnaeus, 1758	Eumetazoa Buetschli, 1910	Gastrotricha Metschnikoff, 1865	Chaetonotida Remane, 1925	Chaetonotidae	Chaetonotus	Chaetonotus	paucisetosus		Marcolongo	1910	N
Animalia Linnaeus, 1758	Eumetazoa Buetschli, 1910	Gastrotricha Metschnikoff, 1865	Chaetonotida Remane, 1925	Chaetonotidae	Chaetonotus	Chaetonotus	pawlowskii	pawlowskii	Kisielewski	1984	N
Animalia Linnaeus, 1758	Eumetazoa Buetschli, 1910	Gastrotricha Metschnikoff, 1865	Chaetonotida Remane, 1925	Chaetonotidae	Chaetonotus	Chaetonotus	pawlowskii	polonicus	Kisielewski	1997	N
Animalia Linnaeus, 1758	Eumetazoa Buetschli, 1910	Gastrotricha Metschnikoff, 1865	Chaetonotida Remane, 1925	Chaetonotidae	Chaetonotus	Chaetonotus	persetosus		Zelinka	1889	N
Animalia Linnaeus, 1758	Eumetazoa Buetschli, 1910	Gastrotricha Metschnikoff, 1865	Chaetonotida Remane, 1925	Chaetonotidae	Chaetonotus	Chaetonotus	polychaetus		Daday	1906	N
Animalia Linnaeus, 1758	Eumetazoa Buetschli, 1910	Gastrotricha Metschnikoff, 1865	Chaetonotida Remane, 1925	Chaetonotidae	Chaetonotus	Chaetonotus	polyspinosus		Greuter	1917	N
Animalia Linnaeus, 1758	Eumetazoa Buetschli, 1910	Gastrotricha Metschnikoff, 1865	Chaetonotida Remane, 1925	Chaetonotidae	Chaetonotus	Chaetonotus	poznaniensis		Kisielewski	1981	N
Animalia Linnaeus, 1758	Eumetazoa Buetschli, 1910	Gastrotricha Metschnikoff, 1865	Chaetonotida Remane, 1925	Chaetonotidae	Chaetonotus	Chaetonotus	pratensis		Schwank	1990	N
Animalia Linnaeus, 1758	Eumetazoa Buetschli, 1910	Gastrotricha Metschnikoff, 1865	Chaetonotida Remane, 1925	Chaetonotidae	Chaetonotus	Chaetonotus	pravus		Kolicka, Kisielewski,Nesteruk & Zawierucha	2013	N	New addition
Animalia Linnaeus, 1758	Eumetazoa Buetschli, 1910	Gastrotricha Metschnikoff, 1865	Chaetonotida Remane, 1925	Chaetonotidae	Chaetonotus	Chaetonotus	pungens		Balsamo	1990	N
Animalia Linnaeus, 1758	Eumetazoa Buetschli, 1910	Gastrotricha Metschnikoff, 1865	Chaetonotida Remane, 1925	Chaetonotidae	Chaetonotus	Chaetonotus	puniceus		Martin	1990	N
Animalia Linnaeus, 1758	Eumetazoa Buetschli, 1910	Gastrotricha Metschnikoff, 1865	Chaetonotida Remane, 1925	Chaetonotidae	Chaetonotus	Chaetonotus	quadratus		Martin	1981	N
Animalia Linnaeus, 1758	Eumetazoa Buetschli, 1910	Gastrotricha Metschnikoff, 1865	Chaetonotida Remane, 1925	Chaetonotidae	Chaetonotus	Chaetonotus	quintospinosus		Greuter	1917	N
Animalia Linnaeus, 1758	Eumetazoa Buetschli, 1910	Gastrotricha Metschnikoff, 1865	Chaetonotida Remane, 1925	Chaetonotidae	Chaetonotus	Chaetonotus	rarispinosus		Roszczak	1936	N
Animalia Linnaeus, 1758	Eumetazoa Buetschli, 1910	Gastrotricha Metschnikoff, 1865	Chaetonotida Remane, 1925	Chaetonotidae	Chaetonotus	Chaetonotus	remanei		Schwank	1990	N
Animalia Linnaeus, 1758	Eumetazoa Buetschli, 1910	Gastrotricha Metschnikoff, 1865	Chaetonotida Remane, 1925	Chaetonotidae	Chaetonotus	Chaetonotus	schlitzensis		Schwank	1990	N
Animalia Linnaeus, 1758	Eumetazoa Buetschli, 1910	Gastrotricha Metschnikoff, 1865	Chaetonotida Remane, 1925	Chaetonotidae	Chaetonotus	Chaetonotus	segnis		Martin	1981	N
Animalia Linnaeus, 1758	Eumetazoa Buetschli, 1910	Gastrotricha Metschnikoff, 1865	Chaetonotida Remane, 1925	Chaetonotidae	Chaetonotus	Chaetonotus	silvaticus		Varga	1963	Y
Animalia Linnaeus, 1758	Eumetazoa Buetschli, 1910	Gastrotricha Metschnikoff, 1865	Chaetonotida Remane, 1925	Chaetonotidae	Chaetonotus	Chaetonotus	similis		Zelinka	1889	N
Animalia Linnaeus, 1758	Eumetazoa Buetschli, 1910	Gastrotricha Metschnikoff, 1865	Chaetonotida Remane, 1925	Chaetonotidae	Chaetonotus	Chaetonotus	sphagnophilus		Kisielewski	1981	N
Animalia Linnaeus, 1758	Eumetazoa Buetschli, 1910	Gastrotricha Metschnikoff, 1865	Chaetonotida Remane, 1925	Chaetonotidae	Chaetonotus	Chaetonotus	spinulosus		Stokes	1887	N
Animalia Linnaeus, 1758	Eumetazoa Buetschli, 1910	Gastrotricha Metschnikoff, 1865	Chaetonotida Remane, 1925	Chaetonotidae	Chaetonotus	Chaetonotus	splendidus		Preobrajenskaia	1926	N
Animalia Linnaeus, 1758	Eumetazoa Buetschli, 1910	Gastrotricha Metschnikoff, 1865	Chaetonotida Remane, 1925	Chaetonotidae	Chaetonotus	Chaetonotus	stagnalis		d'Hondt	1967	N
Animalia Linnaeus, 1758	Eumetazoa Buetschli, 1910	Gastrotricha Metschnikoff, 1865	Chaetonotida Remane, 1925	Chaetonotidae	Chaetonotus	Chaetonotus	trilineatus		Valkanow	1937	N
Animalia Linnaeus, 1758	Eumetazoa Buetschli, 1910	Gastrotricha Metschnikoff, 1865	Chaetonotida Remane, 1925	Chaetonotidae	Chaetonotus	Chaetonotus	trispinosus		Balsamo	1990	N
Animalia Linnaeus, 1758	Eumetazoa Buetschli, 1910	Gastrotricha Metschnikoff, 1865	Chaetonotida Remane, 1925	Chaetonotidae	Chaetonotus	Chaetonotus	vargai		Rudescu	1967	N
Animalia Linnaeus, 1758	Eumetazoa Buetschli, 1910	Gastrotricha Metschnikoff, 1865	Chaetonotida Remane, 1925	Chaetonotidae	Chaetonotus	Chaetonotus	vellosus		Martin	1990	N
Animalia Linnaeus, 1758	Eumetazoa Buetschli, 1910	Gastrotricha Metschnikoff, 1865	Chaetonotida Remane, 1925	Chaetonotidae	Chaetonotus	Chaetonotus	venustus		d'Hondt	1967	N
Animalia Linnaeus, 1758	Eumetazoa Buetschli, 1910	Gastrotricha Metschnikoff, 1865	Chaetonotida Remane, 1925	Chaetonotidae	Chaetonotus	Captochaetus	arethusae		Balsamo & Todaro	1995	N
Animalia Linnaeus, 1758	Eumetazoa Buetschli, 1910	Gastrotricha Metschnikoff, 1865	Chaetonotida Remane, 1925	Chaetonotidae	Chaetonotus	Captochaetus	insigniformis		Greuter	1917	N
Animalia Linnaeus, 1758	Eumetazoa Buetschli, 1910	Gastrotricha Metschnikoff, 1865	Chaetonotida Remane, 1925	Chaetonotidae	Chaetonotus	Captochaetus	jakubskii		Roszczak	1936	N
Animalia Linnaeus, 1758	Eumetazoa Buetschli, 1910	Gastrotricha Metschnikoff, 1865	Chaetonotida Remane, 1925	Chaetonotidae	Chaetonotus	Captochaetus	rafalskii		Kisielewski	1979	N
Animalia Linnaeus, 1758	Eumetazoa Buetschli, 1910	Gastrotricha Metschnikoff, 1865	Chaetonotida Remane, 1925	Chaetonotidae	Chaetonotus	Captochaetus	robustus		Davison	1938	N
Animalia Linnaeus, 1758	Eumetazoa Buetschli, 1910	Gastrotricha Metschnikoff, 1865	Chaetonotida Remane, 1925	Chaetonotidae	Chaetonotus	Captochaetus	simrothi		Voigt	1909	N
Animalia Linnaeus, 1758	Eumetazoa Buetschli, 1910	Gastrotricha Metschnikoff, 1865	Chaetonotida Remane, 1925	Chaetonotidae	Chaetonotus	Captochaetus	tricuspidatus		Schwank	1990	N
Animalia Linnaeus, 1758	Eumetazoa Buetschli, 1910	Gastrotricha Metschnikoff, 1865	Chaetonotida Remane, 1925	Chaetonotidae	Chaetonotus	Captochaetus	vorax		Remane	1936	N
Animalia Linnaeus, 1758	Eumetazoa Buetschli, 1910	Gastrotricha Metschnikoff, 1865	Chaetonotida Remane, 1925	Chaetonotidae	Chaetonotus	Lepidochaetus	carpaticus		Rudescu	1967	N
Animalia Linnaeus, 1758	Eumetazoa Buetschli, 1910	Gastrotricha Metschnikoff, 1865	Chaetonotida Remane, 1925	Chaetonotidae	Chaetonotus	Lepidochaetus	zelinkai		Grünspan	1908	N
Animalia Linnaeus, 1758	Eumetazoa Buetschli, 1910	Gastrotricha Metschnikoff, 1865	Chaetonotida Remane, 1925	Chaetonotidae	Chaetonotus	Primochaetus	acanthocephalus		Valkanow	1937	N
Animalia Linnaeus, 1758	Eumetazoa Buetschli, 1910	Gastrotricha Metschnikoff, 1865	Chaetonotida Remane, 1925	Chaetonotidae	Chaetonotus	Primochaetus	acanthodes		Stokes	1887	N
Animalia Linnaeus, 1758	Eumetazoa Buetschli, 1910	Gastrotricha Metschnikoff, 1865	Chaetonotida Remane, 1925	Chaetonotidae	Chaetonotus	Primochaetus	armatus		Kisielewski	1981	N
Animalia Linnaeus, 1758	Eumetazoa Buetschli, 1910	Gastrotricha Metschnikoff, 1865	Chaetonotida Remane, 1925	Chaetonotidae	Chaetonotus	Primochaetus	arquatus		Voigt	1903	N
Animalia Linnaeus, 1758	Eumetazoa Buetschli, 1910	Gastrotricha Metschnikoff, 1865	Chaetonotida Remane, 1925	Chaetonotidae	Chaetonotus	Primochaetus	bogdanovii		Schimkewitsch	1886	Y
Animalia Linnaeus, 1758	Eumetazoa Buetschli, 1910	Gastrotricha Metschnikoff, 1865	Chaetonotida Remane, 1925	Chaetonotidae	Chaetonotus	Primochaetus	brachyurus		Balsamo	1981	N
Animalia Linnaeus, 1758	Eumetazoa Buetschli, 1910	Gastrotricha Metschnikoff, 1865	Chaetonotida Remane, 1925	Chaetonotidae	Chaetonotus	Primochaetus	chuni		Voigt	1901	N
Animalia Linnaeus, 1758	Eumetazoa Buetschli, 1910	Gastrotricha Metschnikoff, 1865	Chaetonotida Remane, 1925	Chaetonotidae	Chaetonotus	Primochaetus	cordiformis		Greuter	1917	N
Animalia Linnaeus, 1758	Eumetazoa Buetschli, 1910	Gastrotricha Metschnikoff, 1865	Chaetonotida Remane, 1925	Chaetonotidae	Chaetonotus	Primochaetus	heideri		Brehm	1917	N
Animalia Linnaeus, 1758	Eumetazoa Buetschli, 1910	Gastrotricha Metschnikoff, 1865	Chaetonotida Remane, 1925	Chaetonotidae	Chaetonotus	Primochaetus	heteracanthus		Remane	1927	N
Animalia Linnaeus, 1758	Eumetazoa Buetschli, 1910	Gastrotricha Metschnikoff, 1865	Chaetonotida Remane, 1925	Chaetonotidae	Chaetonotus	Primochaetus	macrolepidotus	macrolepidotus	Greuter	1917	N
Animalia Linnaeus, 1758	Eumetazoa Buetschli, 1910	Gastrotricha Metschnikoff, 1865	Chaetonotida Remane, 1925	Chaetonotidae	Chaetonotus	Primochaetus	macrolepidotus	ophiogaster	Remane	1927	N
Animalia Linnaeus, 1758	Eumetazoa Buetschli, 1910	Gastrotricha Metschnikoff, 1865	Chaetonotida Remane, 1925	Chaetonotidae	Chaetonotus	Primochaetus	mutinensis		Balsamo	1978	N
Animalia Linnaeus, 1758	Eumetazoa Buetschli, 1910	Gastrotricha Metschnikoff, 1865	Chaetonotida Remane, 1925	Chaetonotidae	Chaetonotus	Primochaetus	ploenensis		Voigt	1909	N
Animalia Linnaeus, 1758	Eumetazoa Buetschli, 1910	Gastrotricha Metschnikoff, 1865	Chaetonotida Remane, 1925	Chaetonotidae	Chaetonotus	Primochaetus	rectaculeatus		Kisielewska	1981	N
Animalia Linnaeus, 1758	Eumetazoa Buetschli, 1910	Gastrotricha Metschnikoff, 1865	Chaetonotida Remane, 1925	Chaetonotidae	Chaetonotus	Primochaetus	rotundus		Greuter	1917	N
Animalia Linnaeus, 1758	Eumetazoa Buetschli, 1910	Gastrotricha Metschnikoff, 1865	Chaetonotida Remane, 1925	Chaetonotidae	Chaetonotus	Primochaetus	scoticus		Schwank	1990	N
Animalia Linnaeus, 1758	Eumetazoa Buetschli, 1910	Gastrotricha Metschnikoff, 1865	Chaetonotida Remane, 1925	Chaetonotidae	Chaetonotus	Primochaetus	scutulatus		Martin	1981	N
Animalia Linnaeus, 1758	Eumetazoa Buetschli, 1910	Gastrotricha Metschnikoff, 1865	Chaetonotida Remane, 1925	Chaetonotidae	Chaetonotus	Primochaetus	soberanus		Grosso & Drahg	1983	N	New addition
Animalia Linnaeus, 1758	Eumetazoa Buetschli, 1910	Gastrotricha Metschnikoff, 1865	Chaetonotida Remane, 1925	Chaetonotidae	Chaetonotus	Primochaetus	striatus		Preobrajenskaia	1926	N
Animalia Linnaeus, 1758	Eumetazoa Buetschli, 1910	Gastrotricha Metschnikoff, 1865	Chaetonotida Remane, 1925	Chaetonotidae	Chaetonotus	Primochaetus	tenuis		Grünspan	1908	N
Animalia Linnaeus, 1758	Eumetazoa Buetschli, 1910	Gastrotricha Metschnikoff, 1865	Chaetonotida Remane, 1925	Chaetonotidae	Chaetonotus	Primochaetus	veronicae		Kånneby	2013	N	New addition
Animalia Linnaeus, 1758	Eumetazoa Buetschli, 1910	Gastrotricha Metschnikoff, 1865	Chaetonotida Remane, 1925	Chaetonotidae	Chaetonotus	Schizochaetonotus	schultzei		Metschnikoff	1865	N
Animalia Linnaeus, 1758	Eumetazoa Buetschli, 1910	Gastrotricha Metschnikoff, 1865	Chaetonotida Remane, 1925	Chaetonotidae	Chaetonotus	Tristratachaetus	rhombosquamatus		Kolicka, Kisielewski,Nesteruk & Zawierucha		N	New addition
Animalia Linnaeus, 1758	Eumetazoa Buetschli, 1910	Gastrotricha Metschnikoff, 1865	Chaetonotida Remane, 1925	Chaetonotidae	Chaetonotus	Wolterecka	sudeticus		Kisielewski	1984	N
Animalia Linnaeus, 1758	Eumetazoa Buetschli, 1910	Gastrotricha Metschnikoff, 1865	Chaetonotida Remane, 1925	Chaetonotidae	Chaetonotus	Wolterecka	uncinus		Voigt	1902	N
Animalia Linnaeus, 1758	Eumetazoa Buetschli, 1910	Gastrotricha Metschnikoff, 1865	Chaetonotida Remane, 1925	Chaetonotidae	Chaetonotus	Zonochaeta	bisacer		Greuter	1917	N
Animalia Linnaeus, 1758	Eumetazoa Buetschli, 1910	Gastrotricha Metschnikoff, 1865	Chaetonotida Remane, 1925	Chaetonotidae	Chaetonotus	Zonochaeta	caricicola		Schwank	1990	N
Animalia Linnaeus, 1758	Eumetazoa Buetschli, 1910	Gastrotricha Metschnikoff, 1865	Chaetonotida Remane, 1925	Chaetonotidae	Chaetonotus	Zonochaeta	cestacanthus		Balsamo	1990	N
Animalia Linnaeus, 1758	Eumetazoa Buetschli, 1910	Gastrotricha Metschnikoff, 1865	Chaetonotida Remane, 1925	Chaetonotidae	Chaetonotus	Zonochaeta	dracunculus		Balsamo	1990	N
Animalia Linnaeus, 1758	Eumetazoa Buetschli, 1910	Gastrotricha Metschnikoff, 1865	Chaetonotida Remane, 1925	Chaetonotidae	Chaetonotus	Zonochaeta	multisetosus		Preobrajenskaia	1926	N
Animalia Linnaeus, 1758	Eumetazoa Buetschli, 1910	Gastrotricha Metschnikoff, 1865	Chaetonotida Remane, 1925	Chaetonotidae	Chaetonotus	Zonochaeta	pentacanthus		Balsamo	1981	N
Animalia Linnaeus, 1758	Eumetazoa Buetschli, 1910	Gastrotricha Metschnikoff, 1865	Chaetonotida Remane, 1925	Chaetonotidae	Chaetonotus	Zonochaeta	succinctus		Voigt	1902	N
Animalia Linnaeus, 1758	Eumetazoa Buetschli, 1910	Gastrotricha Metschnikoff, 1865	Chaetonotida Remane, 1925	Chaetonotidae	Chaetonotus	Zonochaeta	voigti		Greuter	1917	N
Animalia Linnaeus, 1758	Eumetazoa Buetschli, 1910	Gastrotricha Metschnikoff, 1865	Chaetonotida Remane, 1925	Chaetonotidae	Chaetonotus		dentatus		Tretjakova	1992	N
Animalia Linnaeus, 1758	Eumetazoa Buetschli, 1910	Gastrotricha Metschnikoff, 1865	Chaetonotida Remane, 1925	Chaetonotidae	Chaetonotus		lancearis		Tretjakova	1992	N
Animalia Linnaeus, 1758	Eumetazoa Buetschli, 1910	Gastrotricha Metschnikoff, 1865	Chaetonotida Remane, 1925	Chaetonotidae	Chaetonotus		vechovi		Tretjakova	1992	N
Animalia Linnaeus, 1758	Eumetazoa Buetschli, 1910	Gastrotricha Metschnikoff, 1865	Chaetonotida Remane, 1925	Chaetonotidae	Fluxiderma		concinnum		Stokes	1887	Y
Animalia Linnaeus, 1758	Eumetazoa Buetschli, 1910	Gastrotricha Metschnikoff, 1865	Chaetonotida Remane, 1925	Chaetonotidae	Fluxiderma		montanum		Rudescu	1967	Y
Animalia Linnaeus, 1758	Eumetazoa Buetschli, 1910	Gastrotricha Metschnikoff, 1865	Chaetonotida Remane, 1925	Chaetonotidae	Fluxiderma		verrucosum		Roszczak	1936	Y
Animalia Linnaeus, 1758	Eumetazoa Buetschli, 1910	Gastrotricha Metschnikoff, 1865	Chaetonotida Remane, 1925	Chaetonotidae	Heterolepidoderma		acidophilum		Kånneby, Todaro & Jondelius	2012	N	New addition
Animalia Linnaeus, 1758	Eumetazoa Buetschli, 1910	Gastrotricha Metschnikoff, 1865	Chaetonotida Remane, 1925	Chaetonotidae	Heterolepidoderma		brevitubulatum		Kisielewski	1981	N
Animalia Linnaeus, 1758	Eumetazoa Buetschli, 1910	Gastrotricha Metschnikoff, 1865	Chaetonotida Remane, 1925	Chaetonotidae	Heterolepidoderma		caudosquamatum		Grilli, Kristensen & Balsamo	2009	N
Animalia Linnaeus, 1758	Eumetazoa Buetschli, 1910	Gastrotricha Metschnikoff, 1865	Chaetonotida Remane, 1925	Chaetonotidae	Heterolepidoderma		foliatum		Renaud-Mornant	1967	N
Animalia Linnaeus, 1758	Eumetazoa Buetschli, 1910	Gastrotricha Metschnikoff, 1865	Chaetonotida Remane, 1925	Chaetonotidae	Heterolepidoderma		gracile		Remane	1927	N
Animalia Linnaeus, 1758	Eumetazoa Buetschli, 1910	Gastrotricha Metschnikoff, 1865	Chaetonotida Remane, 1925	Chaetonotidae	Heterolepidoderma		joermungandri		Kånneby	2011	N	New addition
Animalia Linnaeus, 1758	Eumetazoa Buetschli, 1910	Gastrotricha Metschnikoff, 1865	Chaetonotida Remane, 1925	Chaetonotidae	Heterolepidoderma		kossinense		Preobrajenskaia	1926	Y
Animalia Linnaeus, 1758	Eumetazoa Buetschli, 1910	Gastrotricha Metschnikoff, 1865	Chaetonotida Remane, 1925	Chaetonotidae	Heterolepidoderma		lamellatum		Balsamo & Fregni	1995	N
Animalia Linnaeus, 1758	Eumetazoa Buetschli, 1910	Gastrotricha Metschnikoff, 1865	Chaetonotida Remane, 1925	Chaetonotidae	Heterolepidoderma		longicaudatum		Kisielewski	1979	N
Animalia Linnaeus, 1758	Eumetazoa Buetschli, 1910	Gastrotricha Metschnikoff, 1865	Chaetonotida Remane, 1925	Chaetonotidae	Heterolepidoderma		macrops		Kisielewski	1981	N
Animalia Linnaeus, 1758	Eumetazoa Buetschli, 1910	Gastrotricha Metschnikoff, 1865	Chaetonotida Remane, 1925	Chaetonotidae	Heterolepidoderma		majus		Remane	1927	N
Animalia Linnaeus, 1758	Eumetazoa Buetschli, 1910	Gastrotricha Metschnikoff, 1865	Chaetonotida Remane, 1925	Chaetonotidae	Heterolepidoderma		multiseriatum		Balsamo	1978	N
Animalia Linnaeus, 1758	Eumetazoa Buetschli, 1910	Gastrotricha Metschnikoff, 1865	Chaetonotida Remane, 1925	Chaetonotidae	Heterolepidoderma		obesum		d'Hondt	1967	N
Animalia Linnaeus, 1758	Eumetazoa Buetschli, 1910	Gastrotricha Metschnikoff, 1865	Chaetonotida Remane, 1925	Chaetonotidae	Heterolepidoderma		ocellatum		Metschnikoff	1865	Y
Animalia Linnaeus, 1758	Eumetazoa Buetschli, 1910	Gastrotricha Metschnikoff, 1865	Chaetonotida Remane, 1925	Chaetonotidae	Heterolepidoderma		patella		Schwank	1990	N
Animalia Linnaeus, 1758	Eumetazoa Buetschli, 1910	Gastrotricha Metschnikoff, 1865	Chaetonotida Remane, 1925	Chaetonotidae	Heterolepidoderma		pineisquamatum		Balsamo	1981	N
Animalia Linnaeus, 1758	Eumetazoa Buetschli, 1910	Gastrotricha Metschnikoff, 1865	Chaetonotida Remane, 1925	Chaetonotidae	Heterolepidoderma		tenuisquamatum		Kisielewski	1981	N
Animalia Linnaeus, 1758	Eumetazoa Buetschli, 1910	Gastrotricha Metschnikoff, 1865	Chaetonotida Remane, 1925	Chaetonotidae	Heterolepidoderma		trapezoidum		Kånneby	2011	N	New addition
Animalia Linnaeus, 1758	Eumetazoa Buetschli, 1910	Gastrotricha Metschnikoff, 1865	Chaetonotida Remane, 1925	Chaetonotidae	Ichthydium		balatonicum		Varga	1950	N
Animalia Linnaeus, 1758	Eumetazoa Buetschli, 1910	Gastrotricha Metschnikoff, 1865	Chaetonotida Remane, 1925	Chaetonotidae	Ichthydium		bifasciale		Schwank	1990	N
Animalia Linnaeus, 1758	Eumetazoa Buetschli, 1910	Gastrotricha Metschnikoff, 1865	Chaetonotida Remane, 1925	Chaetonotidae	Ichthydium		bifurcatum		Preobrajenskaia	1926	N
Animalia Linnaeus, 1758	Eumetazoa Buetschli, 1910	Gastrotricha Metschnikoff, 1865	Chaetonotida Remane, 1925	Chaetonotidae	Ichthydium		diacanthum		Balsamo & Todaro	1995	N
Animalia Linnaeus, 1758	Eumetazoa Buetschli, 1910	Gastrotricha Metschnikoff, 1865	Chaetonotida Remane, 1925	Chaetonotidae	Ichthydium		dubium		Preobrajenskaia	1926	N
Animalia Linnaeus, 1758	Eumetazoa Buetschli, 1910	Gastrotricha Metschnikoff, 1865	Chaetonotida Remane, 1925	Chaetonotidae	Ichthydium		forcipatum		Voigt	1901	N
Animalia Linnaeus, 1758	Eumetazoa Buetschli, 1910	Gastrotricha Metschnikoff, 1865	Chaetonotida Remane, 1925	Chaetonotidae	Ichthydium		forficula		Remane	1927	N
Animalia Linnaeus, 1758	Eumetazoa Buetschli, 1910	Gastrotricha Metschnikoff, 1865	Chaetonotida Remane, 1925	Chaetonotidae	Ichthydium		fossae		d'Hondt	1972	N
Animalia Linnaeus, 1758	Eumetazoa Buetschli, 1910	Gastrotricha Metschnikoff, 1865	Chaetonotida Remane, 1925	Chaetonotidae	Ichthydium		galeatum		Konsuloff	1921	N
Animalia Linnaeus, 1758	Eumetazoa Buetschli, 1910	Gastrotricha Metschnikoff, 1865	Chaetonotida Remane, 1925	Chaetonotidae	Ichthydium		maximum		Greuter	1917	N
Animalia Linnaeus, 1758	Eumetazoa Buetschli, 1910	Gastrotricha Metschnikoff, 1865	Chaetonotida Remane, 1925	Chaetonotidae	Ichthydium		palustre		Kisielewski	1981	N
Animalia Linnaeus, 1758	Eumetazoa Buetschli, 1910	Gastrotricha Metschnikoff, 1865	Chaetonotida Remane, 1925	Chaetonotidae	Ichthydium		pellucidum		Preobrajenskaia	1926	N
Animalia Linnaeus, 1758	Eumetazoa Buetschli, 1910	Gastrotricha Metschnikoff, 1865	Chaetonotida Remane, 1925	Chaetonotidae	Ichthydium		plicatum		Balsamo & Fregni	1995	N
Animalia Linnaeus, 1758	Eumetazoa Buetschli, 1910	Gastrotricha Metschnikoff, 1865	Chaetonotida Remane, 1925	Chaetonotidae	Ichthydium		podura		Müller	1773	Y
Animalia Linnaeus, 1758	Eumetazoa Buetschli, 1910	Gastrotricha Metschnikoff, 1865	Chaetonotida Remane, 1925	Chaetonotidae	Ichthydium		rostrum		Roszczak	1969	N
Animalia Linnaeus, 1758	Eumetazoa Buetschli, 1910	Gastrotricha Metschnikoff, 1865	Chaetonotida Remane, 1925	Chaetonotidae	Ichthydium		skandicum		Kånneby, Todaro & Jondelius	2009	N
Animalia Linnaeus, 1758	Eumetazoa Buetschli, 1910	Gastrotricha Metschnikoff, 1865	Chaetonotida Remane, 1925	Chaetonotidae	Ichthydium		squamigerum		Balsamo & Fregni	1995	N
Animalia Linnaeus, 1758	Eumetazoa Buetschli, 1910	Gastrotricha Metschnikoff, 1865	Chaetonotida Remane, 1925	Chaetonotidae	Ichthydium		sulcatum		Stokes	1887	Y
Animalia Linnaeus, 1758	Eumetazoa Buetschli, 1910	Gastrotricha Metschnikoff, 1865	Chaetonotida Remane, 1925	Chaetonotidae	Ichthydium		tanytrichum		Balsamo	1983	N
Animalia Linnaeus, 1758	Eumetazoa Buetschli, 1910	Gastrotricha Metschnikoff, 1865	Chaetonotida Remane, 1925	Chaetonotidae	Lepidodermella		intermedia		Kånneby, Todaro & Jondelius	2012	N
Animalia Linnaeus, 1758	Eumetazoa Buetschli, 1910	Gastrotricha Metschnikoff, 1865	Chaetonotida Remane, 1925	Chaetonotidae	Lepidodermella		macrocephala		d'Hondt	1972	N
Animalia Linnaeus, 1758	Eumetazoa Buetschli, 1910	Gastrotricha Metschnikoff, 1865	Chaetonotida Remane, 1925	Chaetonotidae	Lepidodermella		minor		Remane	1936	Y
Animalia Linnaeus, 1758	Eumetazoa Buetschli, 1910	Gastrotricha Metschnikoff, 1865	Chaetonotida Remane, 1925	Chaetonotidae	Lepidodermella		spinifera		Tretjakova	1991	N
Animalia Linnaeus, 1758	Eumetazoa Buetschli, 1910	Gastrotricha Metschnikoff, 1865	Chaetonotida Remane, 1925	Chaetonotidae	Lepidodermella		squamata		Dujardin	1841	Y
Animalia Linnaeus, 1758	Eumetazoa Buetschli, 1910	Gastrotricha Metschnikoff, 1865	Chaetonotida Remane, 1925	Chaetonotidae	Lepidodermella		tabulata		Preobrajenskaia	1926	Y
Animalia Linnaeus, 1758	Eumetazoa Buetschli, 1910	Gastrotricha Metschnikoff, 1865	Chaetonotida Remane, 1925	Chaetonotidae	Lepidodermella		zelinkai		Konsuloff	1913	Y
Animalia Linnaeus, 1758	Eumetazoa Buetschli, 1910	Gastrotricha Metschnikoff, 1865	Chaetonotida Remane, 1925	Chaetonotidae	Polymerurus		entzii		Daday	1882	Y
Animalia Linnaeus, 1758	Eumetazoa Buetschli, 1910	Gastrotricha Metschnikoff, 1865	Chaetonotida Remane, 1925	Chaetonotidae	Polymerurus		longicaudatus		Tatem	1867	Y
Animalia Linnaeus, 1758	Eumetazoa Buetschli, 1910	Gastrotricha Metschnikoff, 1865	Chaetonotida Remane, 1925	Chaetonotidae	Polymerurus		nodicaudus		Voigt	1901	Y
Animalia Linnaeus, 1758	Eumetazoa Buetschli, 1910	Gastrotricha Metschnikoff, 1865	Chaetonotida Remane, 1925	Chaetonotidae	Polymerurus		nodifurca		Marcolongo	1910	Y
Animalia Linnaeus, 1758	Eumetazoa Buetschli, 1910	Gastrotricha Metschnikoff, 1865	Chaetonotida Remane, 1925	Chaetonotidae	Polymerurus		rhomboides		Stokes	1887	Y
Animalia Linnaeus, 1758	Eumetazoa Buetschli, 1910	Gastrotricha Metschnikoff, 1865	Chaetonotida Remane, 1925	Chaetonotidae	Polymerurus		serraticaudus		Voigt	1901	Y
Animalia Linnaeus, 1758	Eumetazoa Buetschli, 1910	Gastrotricha Metschnikoff, 1865	Chaetonotida Remane, 1925	Chaetonotidae	Polymerurus		squammofurcatus		Preobrajenskaia	1926	Y
Animalia Linnaeus, 1758	Eumetazoa Buetschli, 1910	Gastrotricha Metschnikoff, 1865	Chaetonotida Remane, 1925	Chaetonotidae	Rhomballichthys		punctatus		Greuter	1917	Y
Animalia Linnaeus, 1758	Eumetazoa Buetschli, 1910	Gastrotricha Metschnikoff, 1865	Chaetonotida Remane, 1925	Dasydytidae	Anacanthoderma		paucisetosum		Marcolongo	1910	Y
Animalia Linnaeus, 1758	Eumetazoa Buetschli, 1910	Gastrotricha Metschnikoff, 1865	Chaetonotida Remane, 1925	Dasydytidae	Anacanthoderma		punctatum		Marcolongo	1910	N
Animalia Linnaeus, 1758	Eumetazoa Buetschli, 1910	Gastrotricha Metschnikoff, 1865	Chaetonotida Remane, 1925	Dasydytidae	Chitonodytes		collini		Remane	1927	Y
Animalia Linnaeus, 1758	Eumetazoa Buetschli, 1910	Gastrotricha Metschnikoff, 1865	Chaetonotida Remane, 1925	Dasydytidae	Chitonodytes		longisetosus		Metschnikoff	1865	Y
Animalia Linnaeus, 1758	Eumetazoa Buetschli, 1910	Gastrotricha Metschnikoff, 1865	Chaetonotida Remane, 1925	Dasydytidae	Chitonodytes		longispinosus		Greuter	1917	Y
Animalia Linnaeus, 1758	Eumetazoa Buetschli, 1910	Gastrotricha Metschnikoff, 1865	Chaetonotida Remane, 1925	Dasydytidae	Dasydytes	Dasydytes	asymmetricus		Schwank	1990	N
Animalia Linnaeus, 1758	Eumetazoa Buetschli, 1910	Gastrotricha Metschnikoff, 1865	Chaetonotida Remane, 1925	Dasydytidae	Dasydytes	Dasydytes	goniathrix		Gosse	1851	N
Animalia Linnaeus, 1758	Eumetazoa Buetschli, 1910	Gastrotricha Metschnikoff, 1865	Chaetonotida Remane, 1925	Dasydytidae	Dasydytes	Dasydytes	ornatus		Voigt	1909	N
Animalia Linnaeus, 1758	Eumetazoa Buetschli, 1910	Gastrotricha Metschnikoff, 1865	Chaetonotida Remane, 1925	Dasydytidae	Haltidytes		crassus		Greuter	1917	Y
Animalia Linnaeus, 1758	Eumetazoa Buetschli, 1910	Gastrotricha Metschnikoff, 1865	Chaetonotida Remane, 1925	Dasydytidae	Haltidytes		festinans		Voigt	1909	Y
Animalia Linnaeus, 1758	Eumetazoa Buetschli, 1910	Gastrotricha Metschnikoff, 1865	Chaetonotida Remane, 1925	Dasydytidae	Haltidytes		saltitans		Stokes	1887	Y
Animalia Linnaeus, 1758	Eumetazoa Buetschli, 1910	Gastrotricha Metschnikoff, 1865	Chaetonotida Remane, 1925	Dasydytidae	Setopus		bisetosus		Thompson	1891	Y
Animalia Linnaeus, 1758	Eumetazoa Buetschli, 1910	Gastrotricha Metschnikoff, 1865	Chaetonotida Remane, 1925	Dasydytidae	Setopus		chatticus		Schwank	1990	Y
Animalia Linnaeus, 1758	Eumetazoa Buetschli, 1910	Gastrotricha Metschnikoff, 1865	Chaetonotida Remane, 1925	Dasydytidae	Setopus		dubius		Voigt	1909	Y
Animalia Linnaeus, 1758	Eumetazoa Buetschli, 1910	Gastrotricha Metschnikoff, 1865	Chaetonotida Remane, 1925	Dasydytidae	Setopus		iunctus		Greuter	1917	N
Animalia Linnaeus, 1758	Eumetazoa Buetschli, 1910	Gastrotricha Metschnikoff, 1865	Chaetonotida Remane, 1925	Dasydytidae	Setopus		primus		Grünspan	1908	N
Animalia Linnaeus, 1758	Eumetazoa Buetschli, 1910	Gastrotricha Metschnikoff, 1865	Chaetonotida Remane, 1925	Dasydytidae	Setopus		tongiorgii		Balsamo	1983	Y
Animalia Linnaeus, 1758	Eumetazoa Buetschli, 1910	Gastrotricha Metschnikoff, 1865	Chaetonotida Remane, 1925	Dasydytidae	Stylochaeta		fusiformis		Spencer	1890	Y
Animalia Linnaeus, 1758	Eumetazoa Buetschli, 1910	Gastrotricha Metschnikoff, 1865	Chaetonotida Remane, 1925	Dasydytidae	Stylochaeta		longispinosa		Greuter	1917	N
Animalia Linnaeus, 1758	Eumetazoa Buetschli, 1910	Gastrotricha Metschnikoff, 1865	Chaetonotida Remane, 1925	Dasydytidae	Stylochaeta		scirtetica		Brunson	1950	N
Animalia Linnaeus, 1758	Eumetazoa Buetschli, 1910	Gastrotricha Metschnikoff, 1865	Chaetonotida Remane, 1925	Dasydytidae	Stylochaeta		stylifera		Voigt	1901	Y
Animalia Linnaeus, 1758	Eumetazoa Buetschli, 1910	Gastrotricha Metschnikoff, 1865	Chaetonotida Remane, 1925	Dichaeturidae	Dichaetura		capricornia		Metschnikoff	1865	Y
Animalia Linnaeus, 1758	Eumetazoa Buetschli, 1910	Gastrotricha Metschnikoff, 1865	Chaetonotida Remane, 1925	Dichaeturidae	Dichaetura		piscator		Murray	1913	Y
Animalia Linnaeus, 1758	Eumetazoa Buetschli, 1910	Gastrotricha Metschnikoff, 1865	Chaetonotida Remane, 1925	Dichaeturidae	Dichaetura		surreyi		Martin	1990	N
Animalia Linnaeus, 1758	Eumetazoa Buetschli, 1910	Gastrotricha Metschnikoff, 1865	Chaetonotida Remane, 1925	Neogosseidae	Kijanebalola		dubia		de Beauchamp	1932	N	Kijanebalola dubia was unintentionally deleted from the FaEu database and will restored in the next version
Animalia Linnaeus, 1758	Eumetazoa Buetschli, 1910	Gastrotricha Metschnikoff, 1865	Chaetonotida Remane, 1925	Neogosseidae	Neogossea		antennigera		Gosse	1851	Y
Animalia Linnaeus, 1758	Eumetazoa Buetschli, 1910	Gastrotricha Metschnikoff, 1865	Chaetonotida Remane, 1925	Neogosseidae	Neogossea		fasciculata	beauchampi	d'Hondt, Pourriot, Rougier & Guiral	2005	Y
Animalia Linnaeus, 1758	Eumetazoa Buetschli, 1910	Gastrotricha Metschnikoff, 1865	Chaetonotida Remane, 1925	Neogosseidae	Neogossea		voigti		Daday	1905	Y
Animalia Linnaeus, 1758	Eumetazoa Buetschli, 1910	Gastrotricha Metschnikoff, 1865	Macrodasyida Remane, 1925	Turbanellidae	Marinellina		flagellata		Ruttner-Kolisko	1955	N	Placement of Marinellina under consideration (incertae sedis)
